# Supplementary material for: Ecological niche modeling re‐examined: A case study with the Darwin's fox
Source: PubMed Central journal article supplement (PMC5980497; doi:10.1002/ece3.4014), 2018-04-16
Supplement: ECE3-8-4757-s001.pdf [file ECE3-8-4757-s001.pdf]

## Ecological Niche Modeling Re-examined: A Case Study with the Darwin's Fox

Luis E. Escobar<sup>1</sup>, Huijie Qiao<sup>2\*</sup>, Javier Cabello<sup>3,4</sup>, A. Townsend Peterson<sup>5</sup>

<sup>1</sup>Department of Fish and Wildlife Conservation, Virginia Tech, Blacksburg, Virginia, 24061 USA.

<sup>2</sup>Key Laboratory of Animal Ecology and Conservation Biology, Institute of Zoology, Chinese Academy of Sciences, Beijing, 100101 China.

<sup>3</sup>Centro de Conservación de la Biodiversidad Chiloé-Silvestre, Chiloé Island, Los Lagos, Chile.

<sup>4</sup>Facultad de Medicina Veterinaria, Universidad San Sebastián, Campus Pichi Pelluco, Lago Panguipulli, 1390 Puerto Montt, Chile.

<sup>5</sup>Biodiversity Institute, University of Kansas, Lawrence, Kansas, 66045 USA.

\* Corresponding author: Huijie Qiao, qiaohj@ioz.ac.cn

**Table S1. Darwin's fox (*Pseudalopex fulvipes*) occurrence points.** Occurrences are in geographic coordinates. Data were captured from literature and our ongoing field work in southern Chile in areas including, Río Inio; Caleta Emerenciana, Pirámide, Cerro Mirador, Chaiguaco, and Yaldad in Tantauco Park, Río Chaigua, Chaiguate in Chaiguaco; Rahue; Rancho Grande, Lar, Pescado River Chiloé National Park; Huelde; Cucao; Tulo bridge Ahuenco; Dunas Tongoy; Guaibil-Ahuenco; Sector Palomar-Choroihué; Mechaico-San Antonio; San Antonio.

| Longitude | Latitude | Source                      |
|-----------|----------|-----------------------------|
| -73.75    | -43.3333 | (Jiménez and McMahon, 2004) |
| -73.000   | -37.750  | (Jiménez and McMahon, 2004) |
| -72.9843  | -37.887  | (Vasquez-Grandon, 2011)     |
| -72.9995  | -37.8309 | (Vasquez-Grandon, 2011)     |
| -73.02    | -37.826  | (Vasquez-Grandon, 2011)     |
| -72.9812  | -37.8255 | (Vasquez-Grandon, 2011)     |
| -73.012   | -37.8248 | (Vasquez-Grandon, 2011)     |
| -72.9968  | -37.8228 | (Vasquez-Grandon, 2011)     |
| -73.0402  | -37.8208 | (Vasquez-Grandon, 2011)     |
| -72.9633  | -37.8167 | (Vasquez-Grandon, 2011)     |
| -73.0373  | -37.8154 | (Vasquez-Grandon, 2011)     |
| -73.1228  | -37.8118 | (Vasquez-Grandon, 2011)     |
| -73.0198  | -37.811  | (Vasquez-Grandon, 2011)     |
| -73.0224  | -37.8004 | (Vasquez-Grandon, 2011)     |
| -73.1514  | -37.7765 | (Vasquez-Grandon, 2011)     |
| -73.1479  | -37.775  | (Vasquez-Grandon, 2011)     |
| -72.8573  | -37.7704 | (Vasquez-Grandon, 2011)     |

|          |          |                                         |
|----------|----------|-----------------------------------------|
| -73.1104 | -37.7414 | (Vasquez-Grandon, 2011)                 |
| -72.9497 | -37.7358 | (Vasquez-Grandon, 2011)                 |
| -72.9141 | -37.7254 | (Vasquez-Grandon, 2011)                 |
| -73.1148 | -37.704  | (Vasquez-Grandon, 2011)                 |
| -73.115  | -37.7008 | (Vasquez-Grandon, 2011)                 |
| -72.9107 | -37.6994 | (Vasquez-Grandon, 2011)                 |
| -73.1732 | -37.6978 | (Vasquez-Grandon, 2011)                 |
| -73.1646 | -37.6955 | (Vasquez-Grandon, 2011)                 |
| -73.1753 | -37.6909 | (Vasquez-Grandon, 2011)                 |
| -73.1762 | -37.6872 | (Vasquez-Grandon, 2011)                 |
| -73.1489 | -37.685  | (Vasquez-Grandon, 2011)                 |
| -73.1742 | -37.6828 | (Vasquez-Grandon, 2011)                 |
| -73.1212 | -37.6822 | (Vasquez-Grandon, 2011)                 |
| -73.1775 | -37.6773 | (Vasquez-Grandon, 2011)                 |
| -73.1254 | -37.6693 | (Vasquez-Grandon, 2011)                 |
| -73.1351 | -37.6654 | (Vasquez-Grandon, 2011)                 |
| -73.1406 | -37.662  | (Vasquez-Grandon, 2011)                 |
| -73.1454 | -37.6606 | (Vasquez-Grandon, 2011)                 |
| -73.151  | -37.6604 | (Vasquez-Grandon, 2011)                 |
| -73.2223 | -37.6534 | (Vasquez-Grandon, 2011)                 |
| -73.2151 | -37.6501 | (Vasquez-Grandon, 2011)                 |
| -73.2081 | -37.6496 | (Vasquez-Grandon, 2011)                 |
| -73.2005 | -37.6492 | (Vasquez-Grandon, 2011)                 |
| -73.1848 | -37.6249 | (Vasquez-Grandon, 2011)                 |
| -73.1953 | -37.6231 | (Vasquez-Grandon, 2011)                 |
| -73.2019 | -37.6203 | (Vasquez-Grandon, 2011)                 |
| -73.203  | -37.558  | (Vasquez-Grandon, 2011)                 |
| -73.4814 | -43.1134 | (Jiménez et al., 2012)                  |
| -73.731  | -43.0545 | (Jiménez et al., 2012)                  |
| -74.1586 | -42.8688 | (Jiménez et al., 2012)                  |
| -74.1474 | -42.8324 | (Jiménez et al., 2012)                  |
| -73.9736 | -42.7501 | (Jiménez et al., 2012)                  |
| -74.1402 | -42.7226 | (Jiménez et al., 2012)                  |
| -74.0092 | -42.6458 | (Jiménez et al., 2012)                  |
| -74.0343 | -42.0918 | (Jiménez et al., 2012)                  |
| -74.0158 | -42.0609 | (Jiménez et al., 2012)                  |
| -73.6017 | -41.9973 | (Jiménez et al., 2012)                  |
| -73.571  | -41.8411 | (Jiménez et al., 2012)                  |
| -73.9577 | -42.7477 | (González-Acuña et al., 2006)           |
| -74.1222 | -42.7094 | (González-Acuña et al., 2006)           |
| -73.5036 | -42.0117 | (González-Acuña et al., 2006)           |
| -73.9578 | -42.7478 | (Killian and Kristina Killian,<br>2005) |

|          |          |                                                                 |
|----------|----------|-----------------------------------------------------------------|
| -74.1222 | -42.7094 | (Killian and Kristina Killian, 2005)                            |
| -73.5036 | -42.0118 | (Killian and Kristina Killian, 2005)                            |
| -73.900  | -42.400  | (Jimenez et al., 1991)                                          |
| -72.7333 | -37.25   | (Jimenez et al., 1991)                                          |
| -72.8419 | -40.8808 | (Dieguez, 2014)                                                 |
| -73.5833 | -40.0333 | (Farias et al., 2014)                                           |
| -73.4667 | -39.9833 | (Farias et al., 2014)                                           |
| -73.3    | -39.7    | (Farias et al., 2014)                                           |
| -73.2333 | -39.35   | (Vilà et al., 2004)                                             |
| -73.1167 | -37.85   | (Vilà et al., 2004)                                             |
| -72.1    | -39.1833 | (D'Elía et al., 2013)                                           |
| -74.1167 | -43.35   | Field Museum ( <a href="http://www.gbif.org">www.gbif.org</a> ) |
| -74.1531 | -43.3103 | This study                                                      |
| -74.1263 | -43.1487 | This study                                                      |
| -74.1258 | -43.148  | This study                                                      |
| -74.285  | -43.1479 | This study                                                      |
| -74.2811 | -43.1478 | This study                                                      |
| -74.2917 | -43.1473 | This study                                                      |
| -74.2769 | -43.1473 | This study                                                      |
| -74.125  | -43.1466 | This study                                                      |
| -74.1993 | -43.146  | This study                                                      |
| -74.1181 | -43.145  | This study                                                      |
| -74.2659 | -43.1448 | This study                                                      |
| -74.1177 | -43.1447 | This study                                                      |
| -74.013  | -43.1363 | This study                                                      |
| -74.0126 | -43.1356 | This study                                                      |
| -74.0086 | -43.1348 | This study                                                      |
| -73.9959 | -43.1315 | This study                                                      |
| -74.0101 | -43.1309 | This study                                                      |
| -74.0089 | -43.1296 | This study                                                      |
| -74.0079 | -43.1292 | This study                                                      |
| -73.991  | -43.1289 | This study                                                      |
| -73.9808 | -43.1232 | This study                                                      |
| -73.9599 | -43.1209 | This study                                                      |
| -73.9559 | -43.1199 | This study                                                      |
| -73.9469 | -43.1175 | This study                                                      |
| -73.9528 | -43.1175 | This study                                                      |
| -73.9454 | -43.1173 | This study                                                      |
| -73.9515 | -43.1165 | This study                                                      |
| -73.9493 | -43.1153 | This study                                                      |
| -73.795  | -43.0183 | This study                                                      |

|          |          |            |
|----------|----------|------------|
| -73.7851 | -43.0177 | This study |
| -73.7895 | -43.0176 | This study |
| -73.7891 | -43.0171 | This study |
| -73.786  | -43.0161 | This study |
| -74.1199 | -42.6909 | This study |
| -74.1093 | -42.6903 | This study |
| -74.1156 | -42.6887 | This study |
| -74.119  | -42.6881 | This study |
| -74.0842 | -42.5967 | This study |
| -74.0869 | -42.5845 | This study |
| -74.0861 | -42.5807 | This study |
| -74.085  | -42.5797 | This study |
| -74.0794 | -42.5797 | This study |
| -74.0798 | -42.5778 | This study |
| -74.0732 | -42.5697 | This study |
| -74.0774 | -42.5624 | This study |
| -74.0732 | -42.5555 | This study |
| -74.0688 | -42.5491 | This study |
| -74.066  | -42.1527 | This study |
| -74.0619 | -42.1514 | This study |
| -74.0633 | -42.1513 | This study |
| -74.0589 | -42.1502 | This study |
| -74.0585 | -42.1499 | This study |
| -74.0585 | -42.1497 | This study |
| -74.0567 | -42.1484 | This study |
| -74.053  | -42.1467 | This study |
| -74.0357 | -42.1162 | This study |
| -74.0351 | -42.1152 | This study |
| -74.0334 | -42.1137 | This study |
| -74.0339 | -42.1126 | This study |
| -74.0346 | -42.112  | This study |
| -74.0397 | -42.1114 | This study |
| -74.0355 | -42.1108 | This study |
| -74.0453 | -42.1079 | This study |
| -74.0462 | -42.1075 | This study |
| -74.0465 | -42.1071 | This study |
| -74.0469 | -42.1067 | This study |
| -74.0508 | -42.1066 | This study |
| -74.0474 | -42.1065 | This study |
| -74.0477 | -42.1063 | This study |
| -74.0509 | -42.1063 | This study |
| -74.0544 | -42.106  | This study |
| -74.0521 | -42.1059 | This study |

|          |          |            |
|----------|----------|------------|
| -74.0519 | -42.1049 | This study |
| -74.0408 | -42.1023 | This study |
| -74.0399 | -42.0998 | This study |
| -74.0347 | -42.0833 | This study |
| -74.0346 | -42.0792 | This study |
| -74.0311 | -42.0762 | This study |
| -73.7706 | -42.0622 | This study |
| -73.7706 | -42.0622 | This study |
| -73.7706 | -42.0622 | This study |
| -74.000  | -42.000  | This study |
| -73.8283 | -41.9583 | This study |
| -73.8283 | -41.9583 | This study |
| -73.8283 | -41.9583 | This study |
| -73.8283 | -41.9583 | This study |
| -73.8283 | -41.9583 | This study |
| -73.8283 | -41.9583 | This study |
| -73.8283 | -41.9583 | This study |
| -72.9695 | -37.8262 | This study |
| -73.0342 | -37.825  | This study |

## References

- D'Elía, G., Ortloff, A., Sanchez, P., Guiñez, B., Varas, 2013. A new geographic record of the endangered Darwin's fox *Lycalopex fulvipes* (Carnivora: Canidae): Filling the distributional gap. *Rev. Chil. Hist. Nat.* 86, 485–488. doi:10.4067/S0716-078X2013000400010
- Dieguez, A., 2014. Niños ayudaron a encontrar al esquivo zorro de Darwin. *Las Ultim. Not.* 14.
- Farias, A.A., Sepúlveda, M.A., Silva-rodríguez, E.A., Eguren, A., González, D., Jordán, N.I., Ovando, E., Stowhas, P., Svensson, G.L., 2014. A new population of Darwin's fox (*Lycalopex fulvipes*) in the Valdivian Coastal Range. *Rev. Chil. Hist. Nat.* doi:10.1186/0717-6317-1-3
- González-Acuña, D., Briceño, C., Cicchino, A., Funk, S.M., Jiménez, J., 2006. First records of *Trichodectes canis* (Insecta: Phthiraptera: Trichodectidae) from Darwin's fox, *Pseudalopex fulvipes* (Mammalia: Carnivora: Canidae). *Eur. J. Wildl. Res.* 53, 76–79. doi:10.1007/s10344-006-0066-y
- Jiménez, J., Briceño, C., Alcaíno, H., Funk, S., 2012. Coprologic survey of endoparasites from Darwin's fox (*Pseudalopex fulvipes*) in Chiloé, Chile. *Arch Med Vet* 97, 93–97.
- Jimenez, J.E., Marquet, P.A., Medel, R.G., Jaksic, F.M., 1991. Comparative ecology of Darwin's Fox (*Pseudalopex fulvipes*) in mainland and island settings of southern Chile. *Rev. Chil.* 63, 177–186.
- Jiménez, J.E., McMahon, E., 2004. Darwin's fox *Pseudalopex fulvipes* (Martin, 1837)

Critically Endangered – CR: C2a(ii) (2004), in: Hoffmann, M., Mech, D., Sillero-Zubiri, C. (Eds.), *Canids: Foxes, Wolves, Jackals and Dogs: Status Survey and Conservation Action Plan*. IUCN Canid Specialist Group, Cambridge, pp. 50–55.

Killian, K., Kristina Killian, 2005. Telemetrische Untersuchung zum Einfluss des Menschen auf die Lebensraumnutzung des Darwin-Fuchses (*Pseudalopex fulvipes*, Martin 1837) auf Chiloé, Chile. Universität Hamburg.

Vasquez-Grandon, A., 2011. Conservación del zorro de Darwin en la Cordillera de Nahuelbuta., in: *Preservación y Conservación de la Flora y Fauna de la Cordillera de Nahuelbuta*. Angol, p. 32.

Vilà, C., Leonard, J. A., Iriarte, A., O'Brien, S.J., Johnson, W.E., Wayne, R.K., 2004. Detecting the vanishing populations of the highly endangered Darwin's fox, *Pseudalopex fulvipes*. *Anim. Conserv.* 7, 147–153.  
doi:10.1017/S1367943004001271
